# Supplementary material
Source: PubMed Central journal article supplement (PMC6844117)
Supplement: ao9b02779_si_001.pdf [file ao9b02779_si_001.pdf]

## Supporting information

### **Copper (II), Zinc (II) and Cadmium (II) Formylbenzoate Complexes: Reactivity and Emission Properties**

Jitendra Nath, Arup Tarai, Jubaraj B. Baruah\*

Department of Chemistry, Indian Institute of Technology Guwahati, Guwahati -781 039, Assam, India. Fax:  
+91-361-2690762; Ph. +91-361-2582311; email: [juba@iitg.ac.in](mailto:juba@iitg.ac.in)

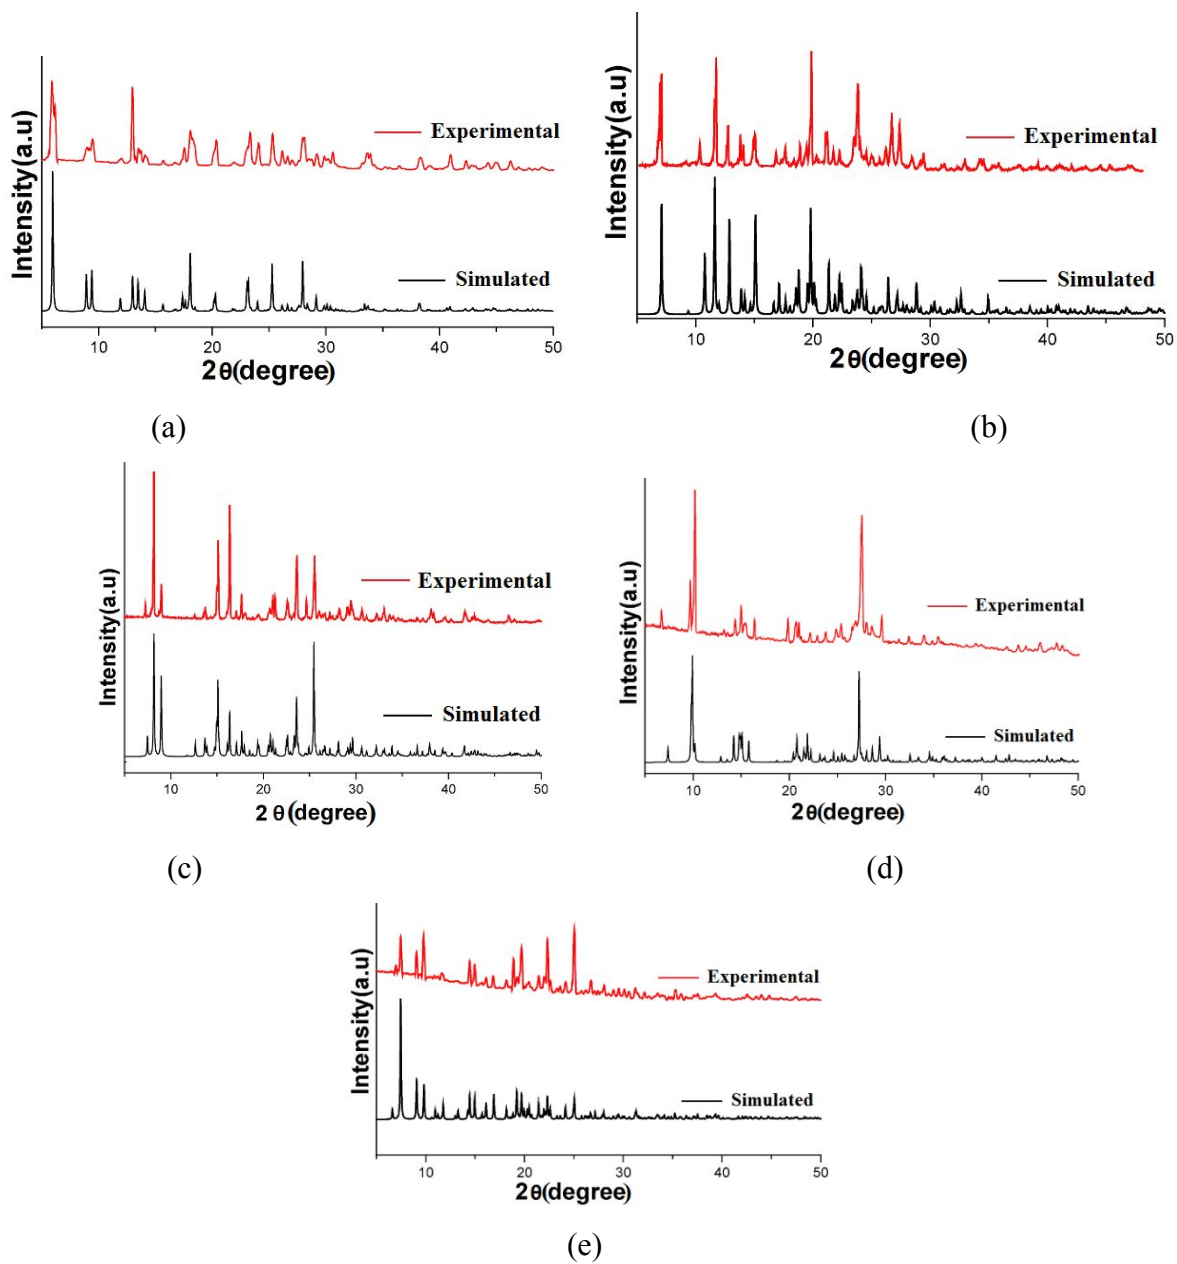

Figure S1: PXR D of (a) Complex 1; (b) Complex 2; (c) Complex 3; (d) Complex 4; (e) Complex 5

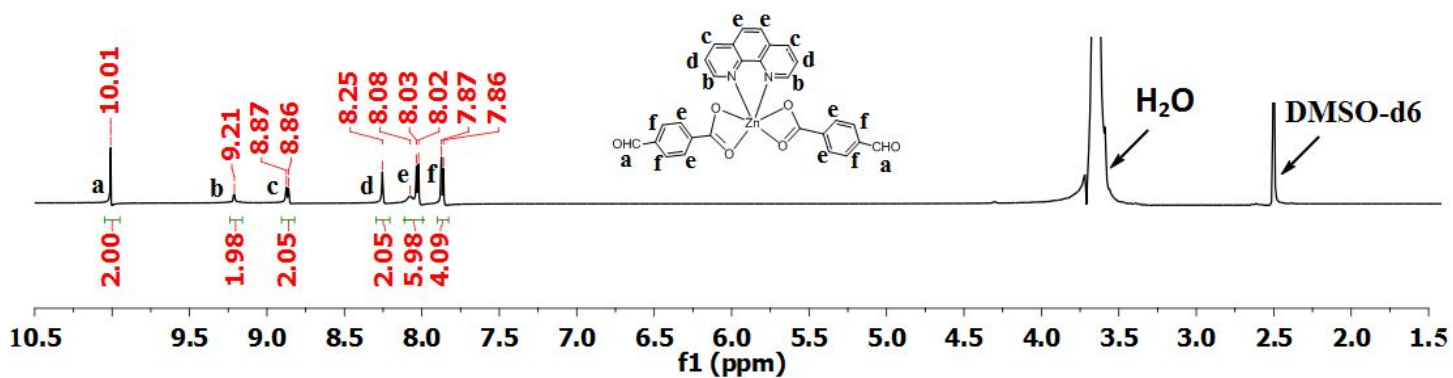

Figure S2:  $^1\text{H-NMR}$  (DMSO- $d_6$ ) spectra of Complex **2** (the assignments of protons are as per numbers a-f in the structure).

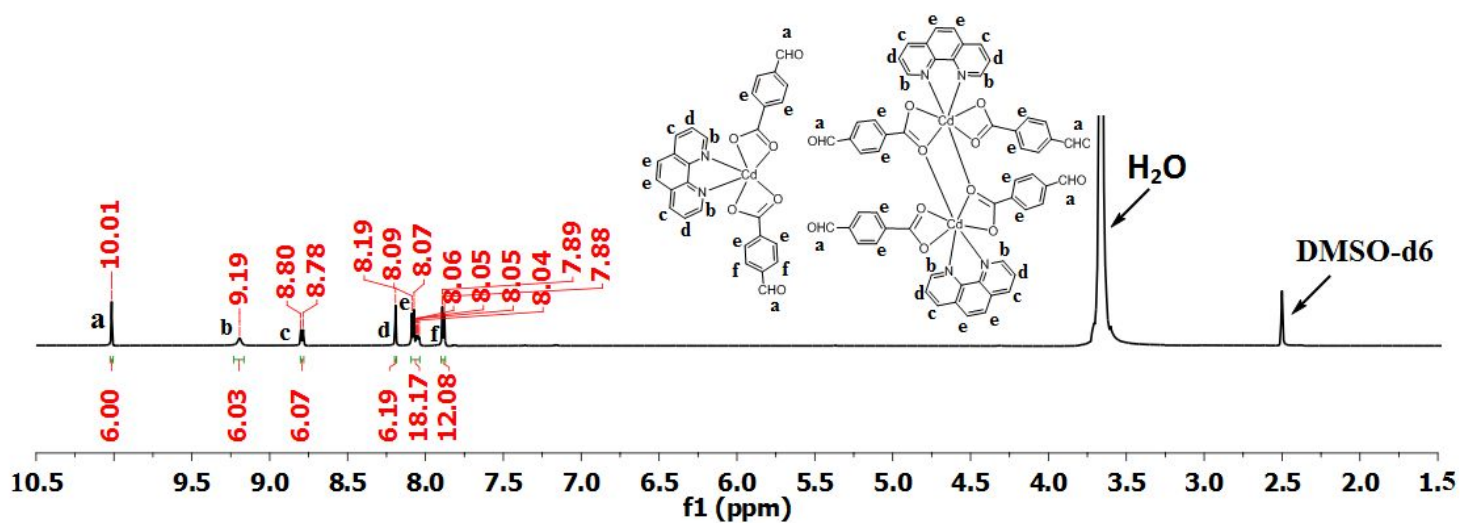

Figure S3:  $^1\text{H-NMR}$  (DMSO- $d_6$ ) spectra of Complex **5** (the assignments of protons are as per numbers a-f in structure).

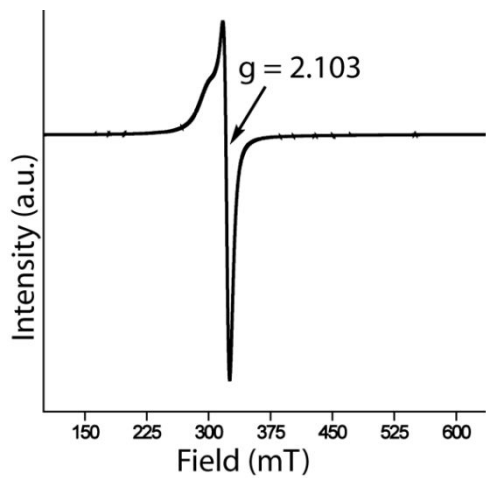

(a)

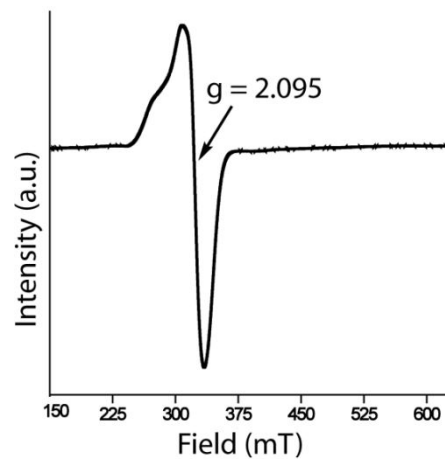

(b)

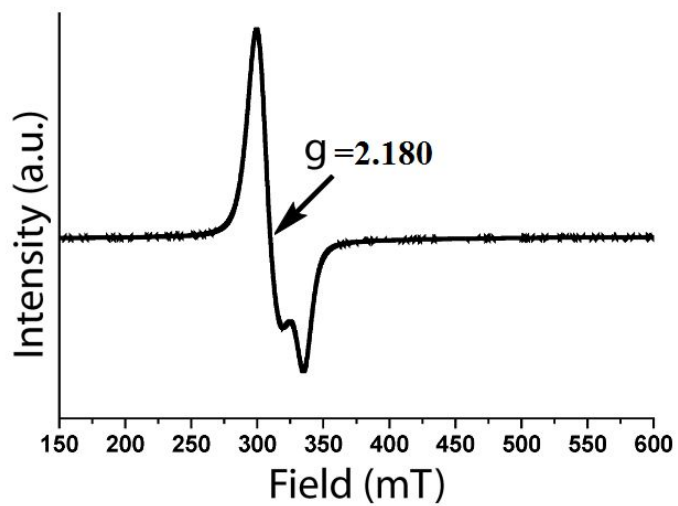

(c)

Figure S4: ESR spectra of (a) Complex 1, (b) Complex 3, (c) Complex 4.

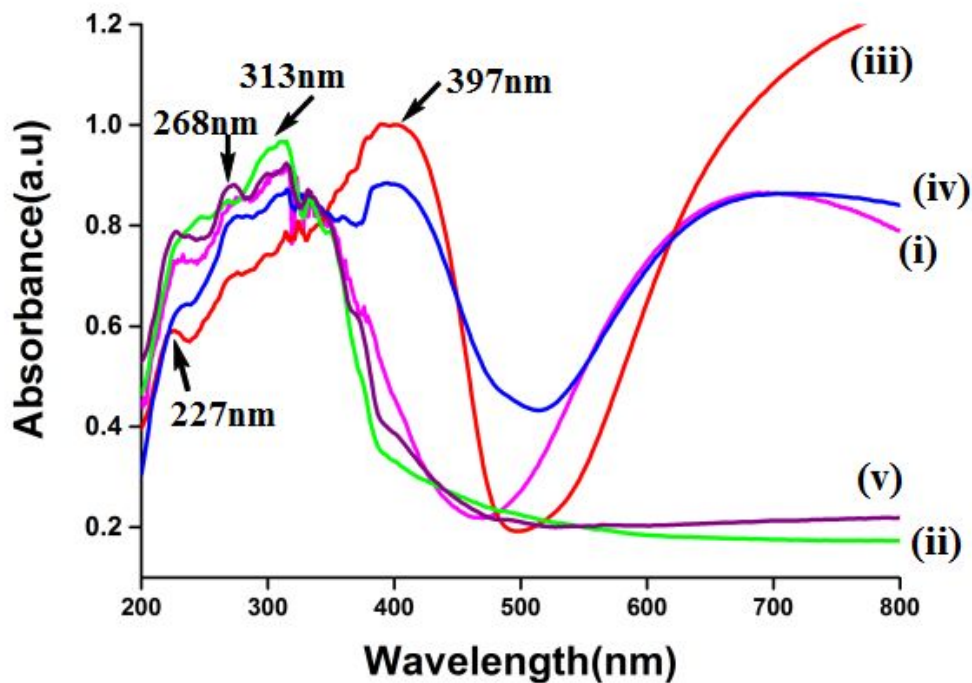

Figure S5: Solid state UV-Visible spectra of complexes (i) complex 1 (ii) complex 2 (iii) complex 3 (iv) complex 4 and (v) complex 5

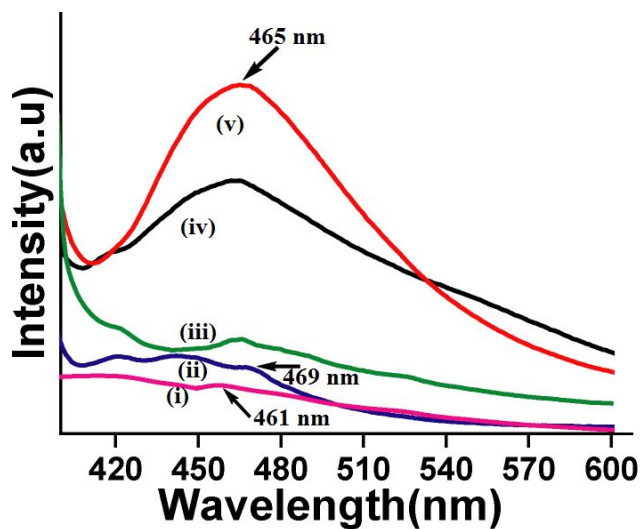

Figure S6: The fluorescence emission spectra of solid sample of complexes (i) 4; (ii) 1; (iii) 3; (iv) 2 and (v) 5 ( $\lambda_{ex}$  = 385 nm).

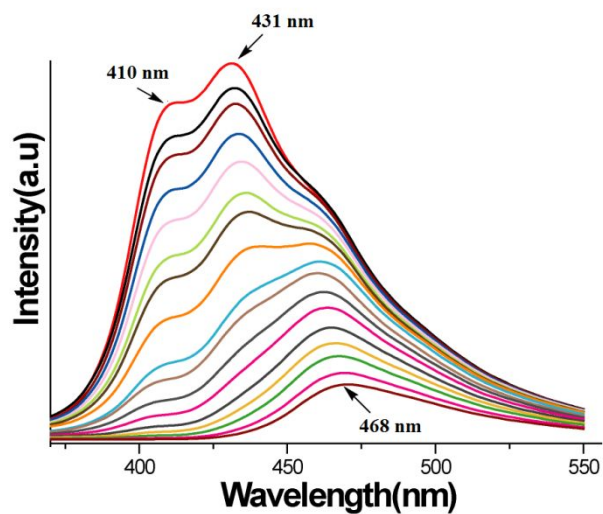

Figure S7: Fluorescence titration ( $\lambda_{\text{ex}}=350$  nm) of complex **2** ( $10^{-4}$  M in DMSO) upon addition of 2-amino-5-nitrophenol.

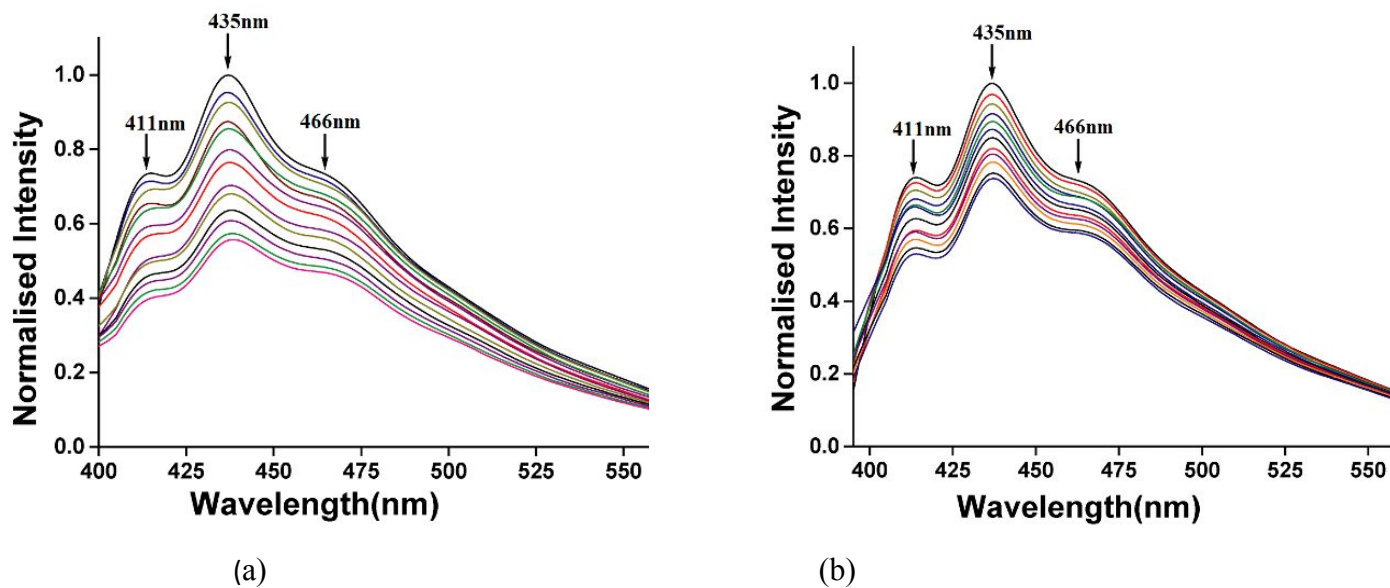

Figure S8: Fluorescence titration (excitation at 385 nm) of ligand complex **2** ( $10^{-3}$  M in DMSO) with (a) 2-nitroaniline, (b) 3-nitroaniline (20  $\mu\text{l}$  aliquot of  $10^{-3}$  M in DMSO). showing quenching of emission .

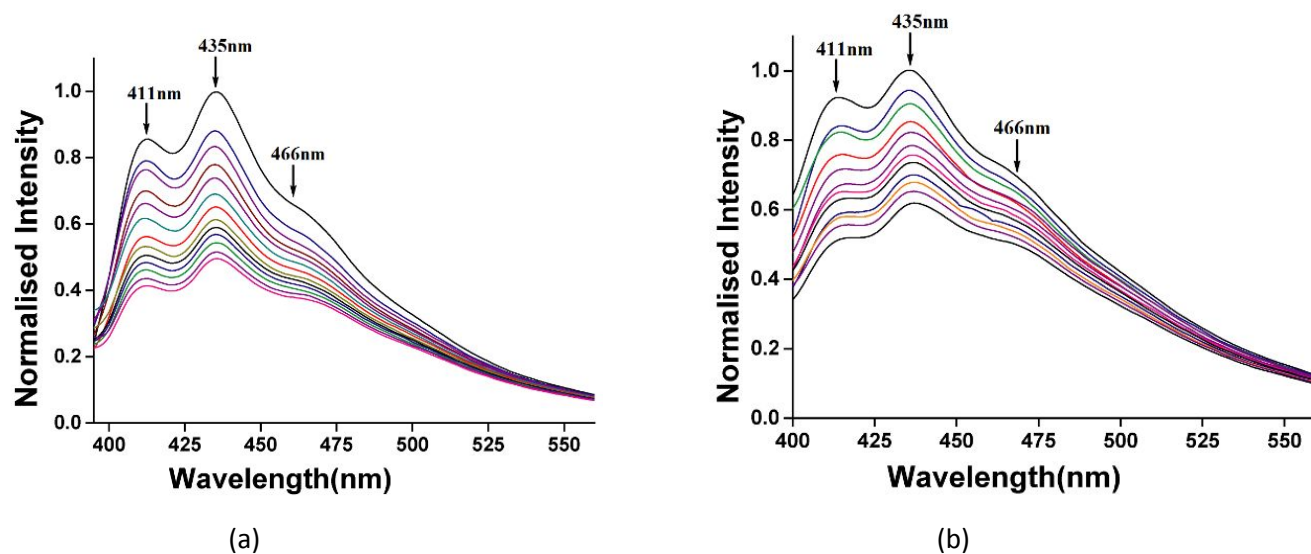

Figure S9: Fluorescence titration (excitation at 385 nm) of ligand complex **5** ( $10^{-4}$  M in DMSO) with (a) 2-nitroaniline, (b) 3-nitroaniline (20  $\mu$ l aliquot of  $10^{-4}$  M in DMSO). showing quenching of emission

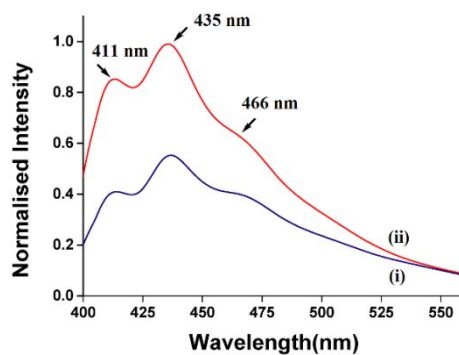

Figure S10: The fluorescence emission spectra of the (i) complex **2** and (ii) complex **5** in DMSO solution ( $\lambda_{\text{ex}} = 385$  nm).

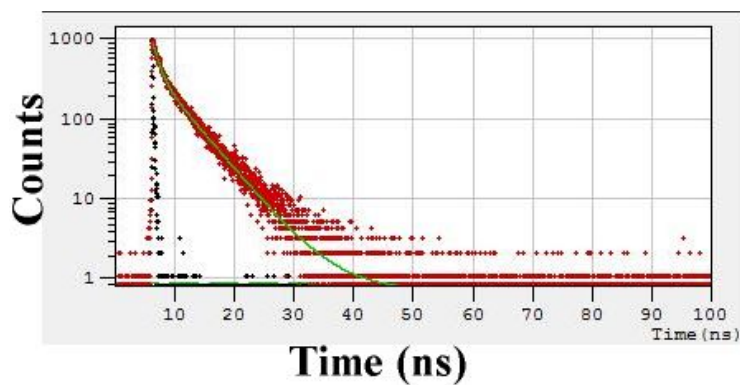

|   | $B_i$  | $\Delta B_i$ | $f_i$ (%) | $\Delta f_i$ (%) | $\tau_i$ (ns) | $\Delta \tau_i$ (ns) |
|---|--------|--------------|-----------|------------------|---------------|----------------------|
| 1 | 0.1908 | 0.0098       | 4.389     | 0.224            | 0.077 fixed   | 0                    |
| 2 | 0.0701 | 0.0014       | 22.778    | 1.022            | 1.087         | 0.026                |
| 3 | 0.0491 | 0.0008       | 72.834    | 1.243            | 4.967         | 0.002                |

Goodness of fit  $\chi^2$  : 1.036

Figure S11: Time resolved fluorescence emission of solid sample of complex **5** ( $\lambda_{ex} = 385$  nm,  $\lambda_{em} = 465$  nm).

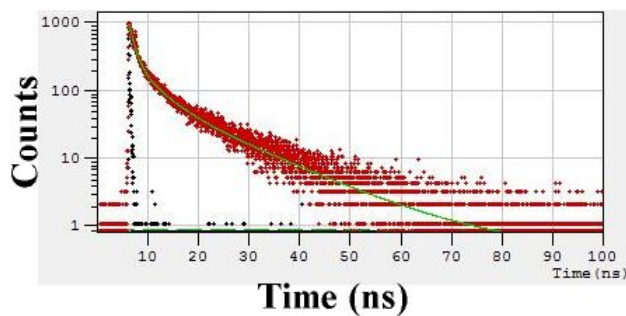

|   | $B_i$  | $\Delta B_i$ | $f_i$ (%) | $\Delta f_i$ (%) | $\tau_i$ (ns) | $\Delta \tau_i$ (ns) |
|---|--------|--------------|-----------|------------------|---------------|----------------------|
| 1 | 0.1310 | 0.0049       | 32.768    | 2.202            | 1.028         | 0.031                |
| 2 | 0.0286 | 0.0017       | 28.410    | 1.766            | 4.086         | 0.017                |
| 3 | 0.0119 | 0.0009       | 38.822    | 2.817            | 13.355        | 0.002                |

Goodness of fit  $\chi$ : 1.081

Figure S12: Time resolved fluorescence emission of solid sample of the complex **2** ( $\lambda_{ex} = 385$  nm,  $\lambda_{em} = 465$  nm).



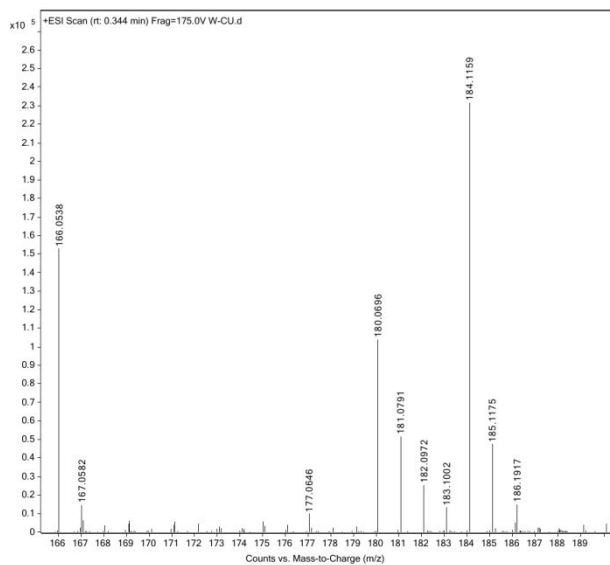

(a)

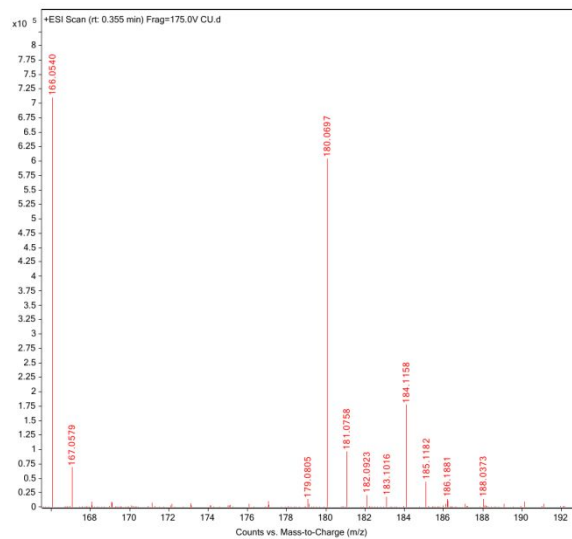

(b)

Figure S13: ESI mass in the range of  $m/z$  160 -  $m/z$  190 of reaction mixture of the reaction between hydroxylamine hydrochloride, 1,10-phenanthroline, copper(II) acetate in the presence of sodium acetate carried out by adding (a) isotopic labeled  $H_2O$  (labeled with isotope with atomic mass 18) and (b)  $H_2O$ .

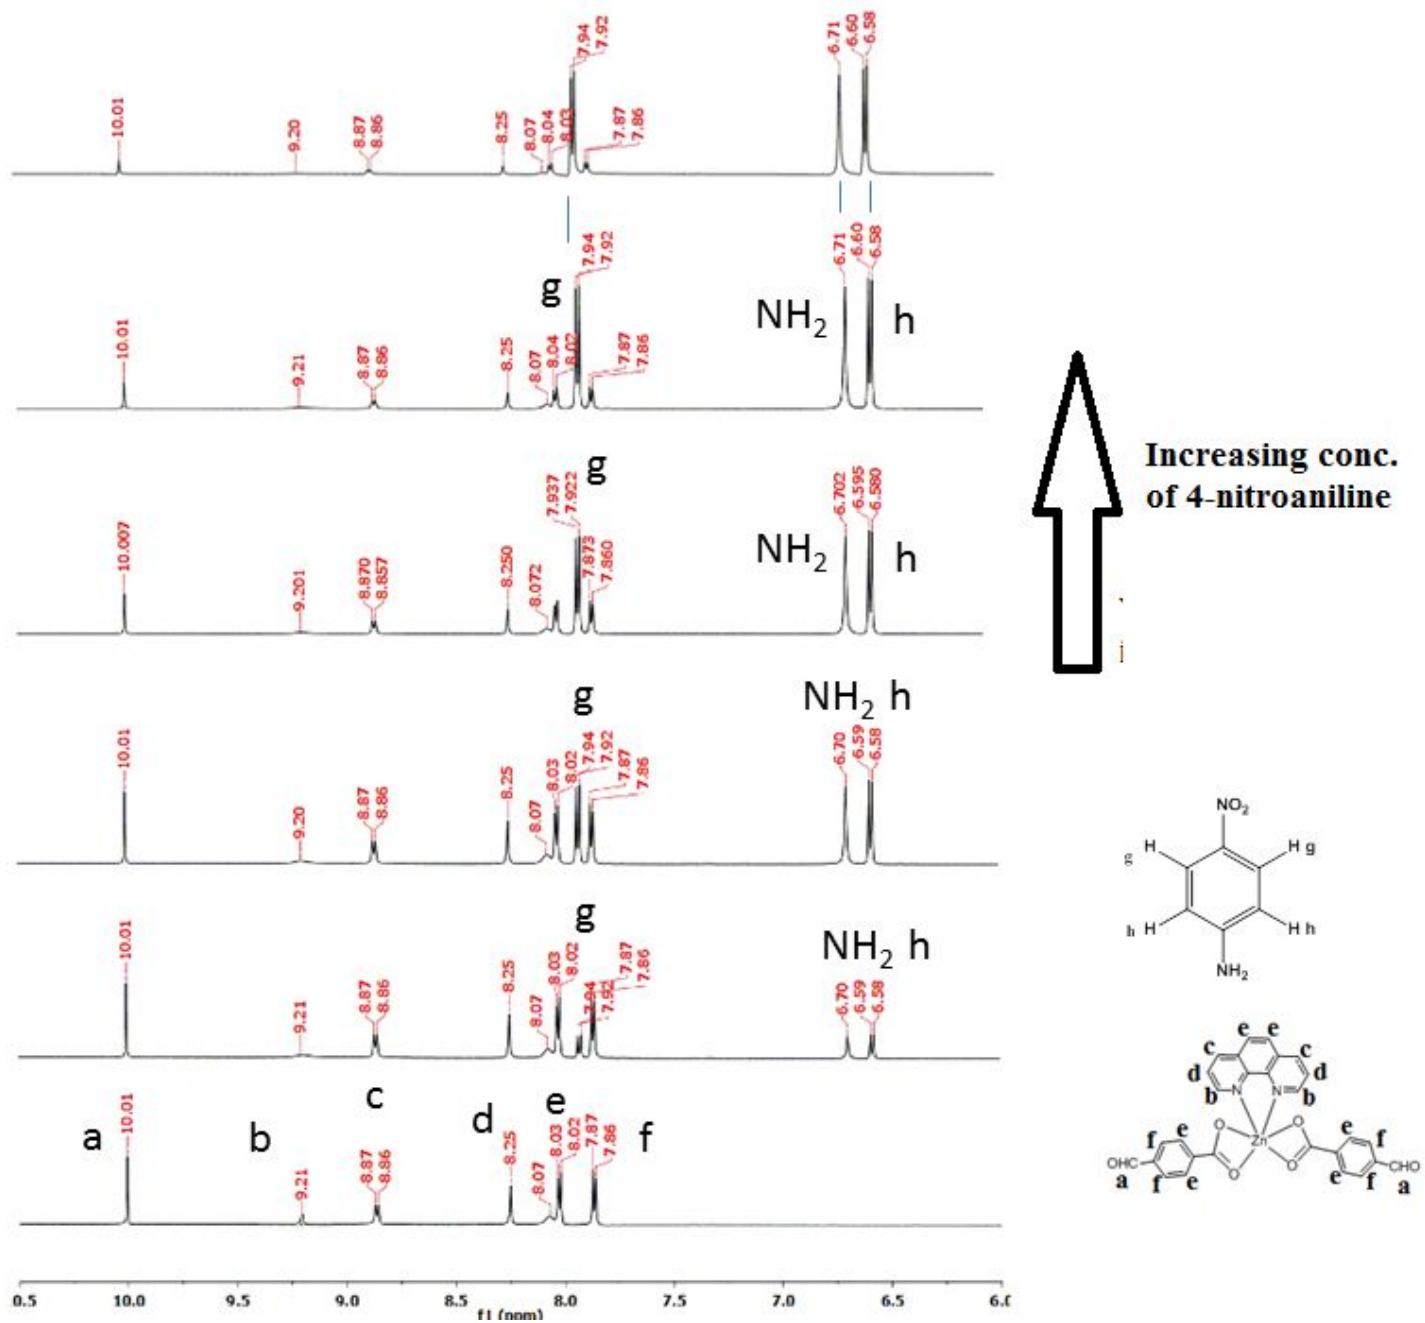

Figure S14:  $^1\text{H-NMR}$  (6 ppm to 10.5 ppm) titration of complex **2** by adding different amounts of 4-nitroaniline (a-h are chemical-shift positions of the protons as per the labels shown in the structures).

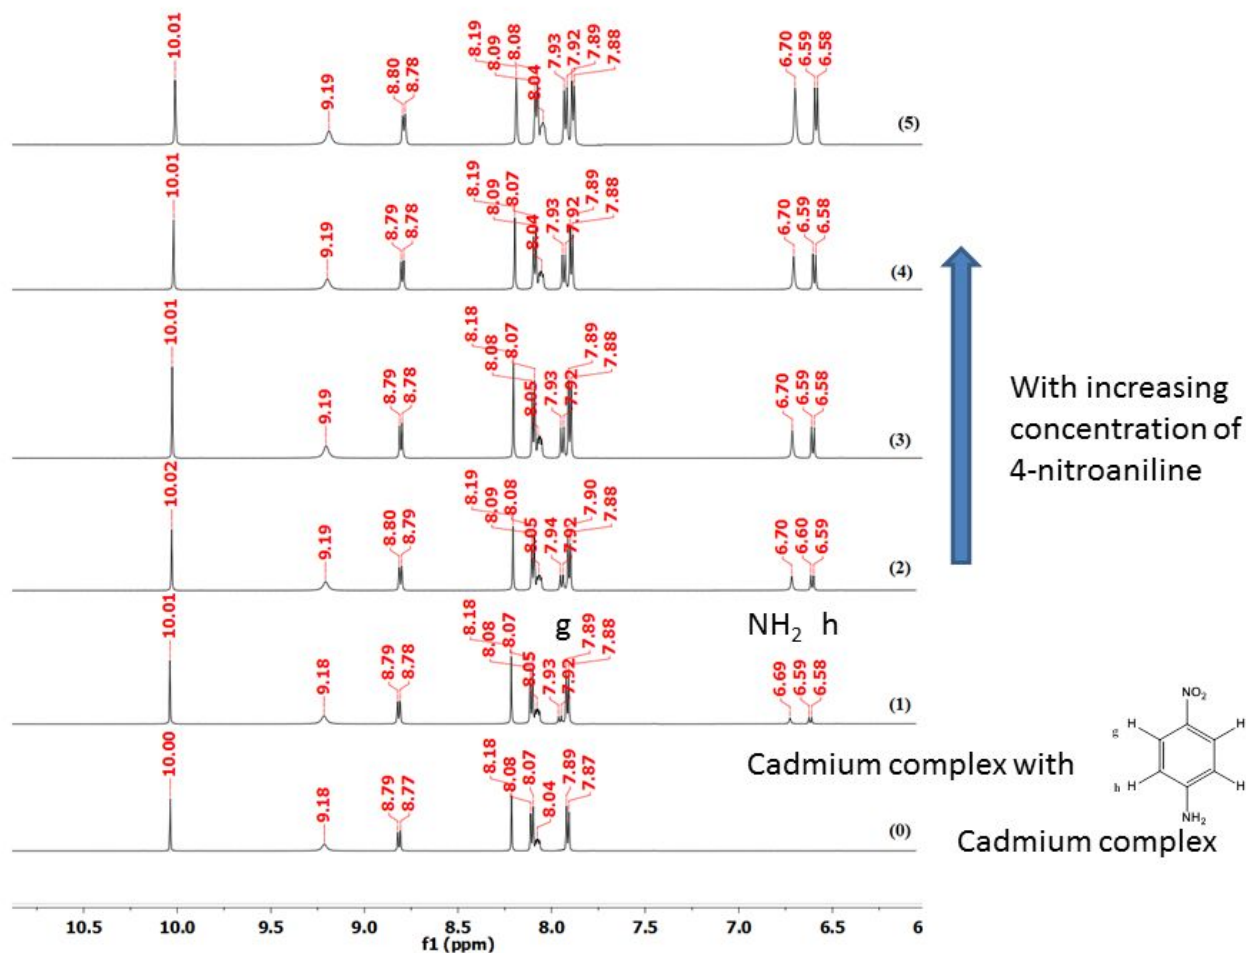

Figure S15: <sup>1</sup>H-NMR titration of complex **5** by adding different amounts of 4-nitroaniline (0) cadmium complex (1) to (5) are with increasing amount of 4-nitroaniline (g and h are the signals from the protons marked as g and h in structure of 4-nitroaniline) .

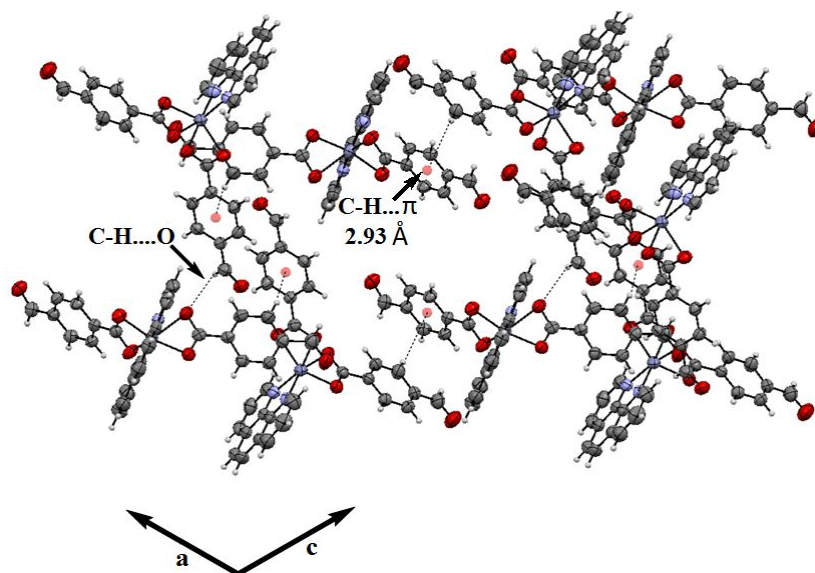

Figure S16: Packing diagram of the zinc complex (2)

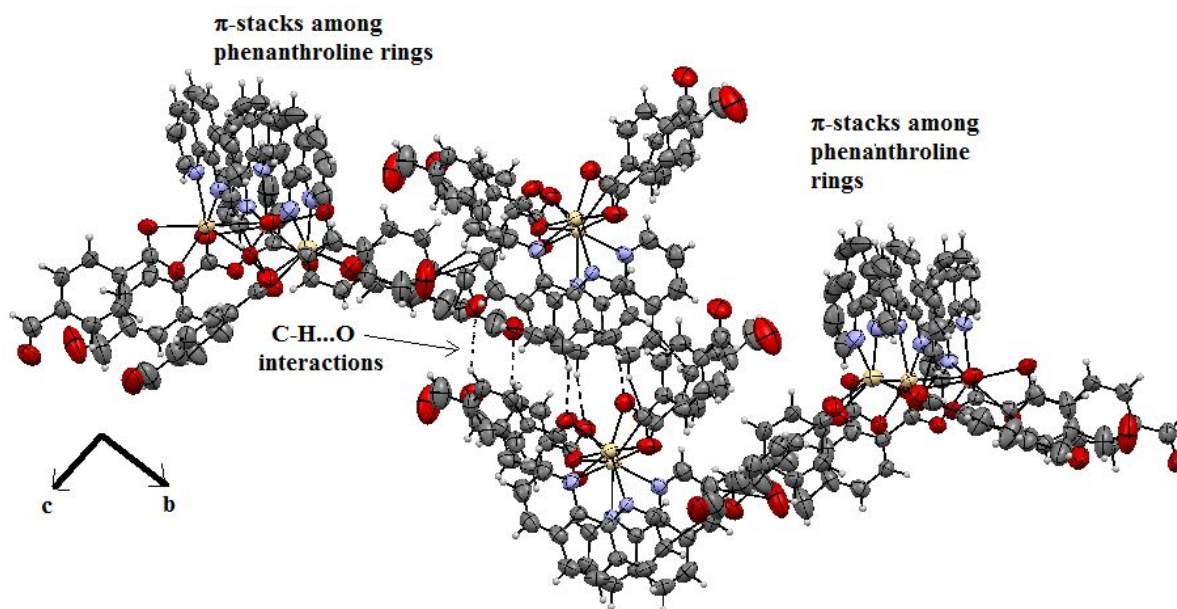

Figure S17: Packing diagram of the molecular complex of cadmium (5) showing C-H...O interactions between the neutral molecules.

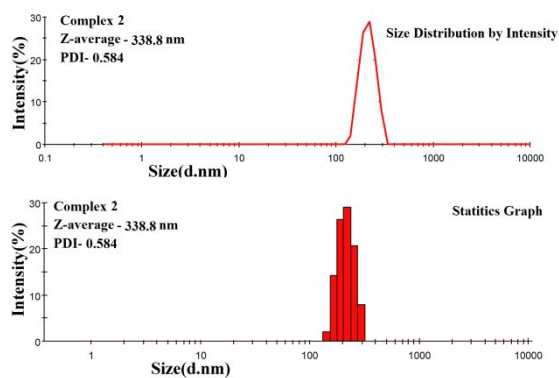

(a)

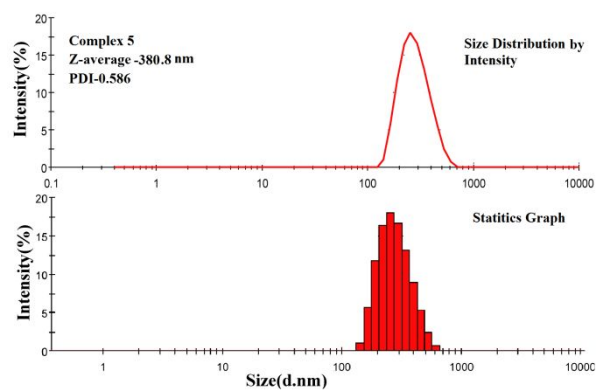

(b)

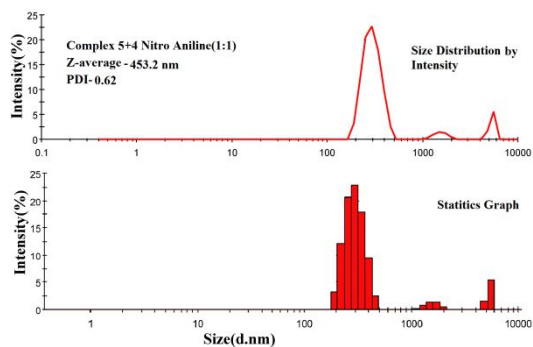

(c)

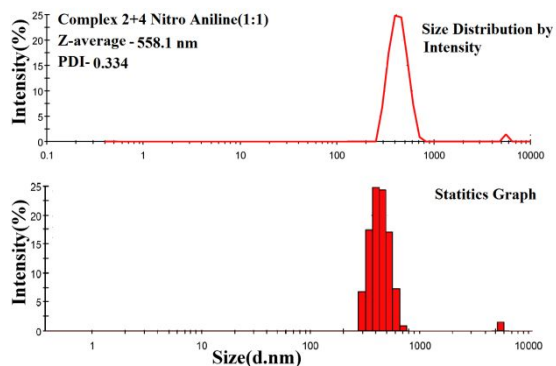

(d)

Figure S18: Particle size measurements from plots of intensity vs size from dynamic light-scattering of the (a) zinc complex (2) (b) cadmium complex (5) (c) the zinc complex with 4-nitroaniline (d) the cadmium complex with 4-nitroaniline.

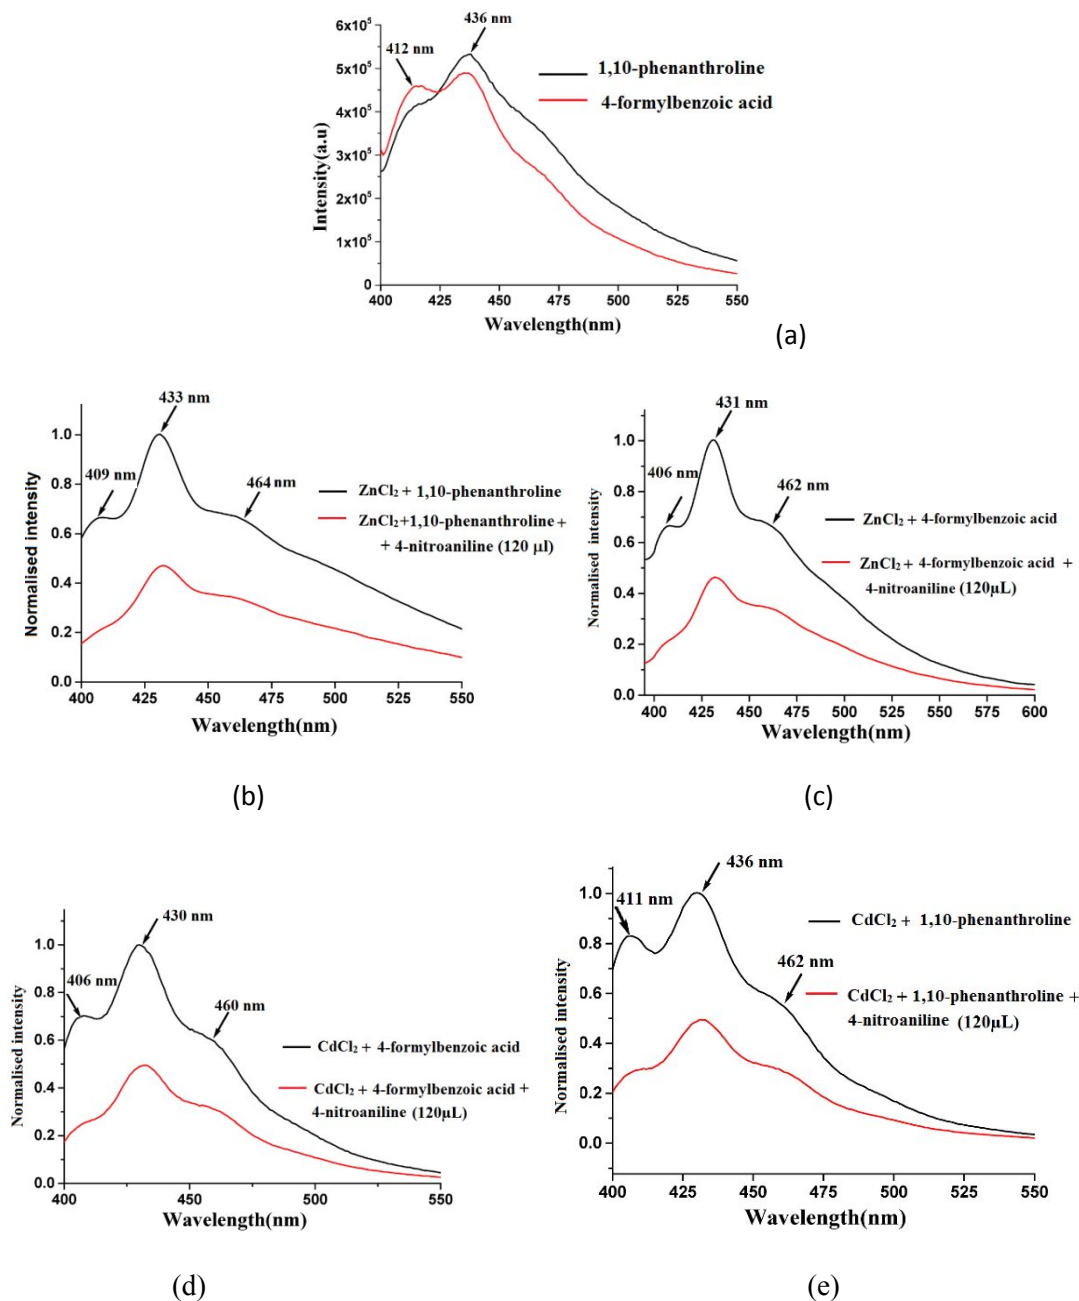

Figure S19: Fluorescence emission spectra (excitation at 385nm) of (a) 1,10-phenanthroline and 4-formylbenzoic acid in DMSO ( $10^{-4}$ M). Emission spectra from different solutions of (b) ZnCl<sub>2</sub> with 1,10-phenanthroline and 4-nitroaniline; (c) ZnCl<sub>2</sub> with 4-formylbenzoic acid; (d) CdCl<sub>2</sub> with 1,10-phenanthroline and 4-nitroaniline and (e) CdCl<sub>2</sub> with 4-formylbenzoic acid and 4-nitroaniline (in each case 120 μL of 4-nitroaniline added to 2 ml solution of the other components in DMSO of identical concentrations to perform quenching experiment).

Table S1: Photoluminescence quantum yield of the complexes in different solvents

| Solvent                                      | Complex 2 | Complex 5 |
|----------------------------------------------|-----------|-----------|
| Dimethylsulphoxide                           | 0.0122    | 0.0821    |
| Dimethylsulphoxide + Dimethylformamide (4:1) | 0.0097    | 0.0769    |
| Dimethylsulphoxide + acetonitrile (4:1)      | 0.0061    | 0.0694    |
| Dimethylsulphoxide + methanol (4:1)          | 0.0065    | 0.0728    |
| Dimethylsulphoxide + water (4:1)             | 0.0062    | 0.0793    |

Table S2: Hydrogen bond parameters of the complexes

| Complex          | D-H...A                                   | $d_{D-H}$ (Å) | $d_{H...A}$ (Å) | $d_{D...A}$ (Å) | $\angle D-H...A$ (°) |
|------------------|-------------------------------------------|---------------|-----------------|-----------------|----------------------|
| <b>Complex 1</b> | O(7) -H(7) ...O(5) [x, y, z]              | 0.82          | 1.78            | 2.543(6)        | 154                  |
|                  | O(7) -H(7G) ...O(2) [x, y, z]             | 0.87(4)       | 1.81(5)         | 2.627(6)        | 156(5)               |
|                  | C(26) -H(26) ...O(2) [x,1+y,z]            | 0.93          | 2.37            | 3.290(7)        | 169                  |
| <b>Complex 2</b> | C(9) -H(9) ...O(5) [2-x,1-y,1-z]          | 0.93          | 2.52            | 3.224(4)        | 133                  |
|                  | C(15) -H(15) ...O(3) [-1+x,y,z]           | 0.93          | 2.41            | 3.332(4)        | 169                  |
|                  | C(16) -H(16) ...O(5) [-1+x,y,z]           | 0.93          | 2.41            | 3.166(4)        | 139                  |
|                  | C(18) -H(18) ...O(6) [1+x, y, z]          | 0.93          | 2.53            | 3.438(4)        | 166                  |
|                  | C(21) -H(21) ...O(1) [-1+x,y,z]           | 0.93          | 2.58            | 3.484(4)        | 164                  |
|                  | C(24) -H(24) ...O(4) [1+x, y, z]          | 0.93          | 2.49            | 3.394(4)        | 163                  |
|                  | C(30) -H(30) ...O(4) [1/2-x,-1/2+y,1/2-z] | 0.93          | 2.59            | 3.367(4)        | 141                  |
| <b>Complex 3</b> | O(1) -H(1) ...O(4) [1/2-x,y,-z]           | 0.82          | 1.83            | 2.625(4)        | 162                  |
|                  | O(3) -H(3) ...Cl(2) [-1/2+x,1/2+y,1/2+z]  | 0.82          | 2.37            | 3.128(3)        | 154                  |
|                  | O(4) -H(4A) ...O(2) [x, y, z]             | 0.87(6)       | 1.97(6)         | 2.784(4)        | 156(4)               |
|                  | O(4) -H(4B) ...Cl(2) [x, y, z]            | 0.90(4)       | 2.35(4)         | 3.228(3)        | 166(4)               |
|                  | C(3) -H(3A) ...N(1) [1/2+x,-y,z]          | 0.93          | 2.58            | 3.412(4)        | 149                  |
|                  | C(20) -H(20) ...Cl(1) [3/2-x,1/2-y,1/2-z] | 0.93          | 2.83            | 3.607(3)        | 142                  |
| <b>Complex 4</b> | N(3) -H(3A) ...O(7) [x,-1+y,z]            | 0.72(3)       | 2.07(3)         | 2.775(6)        | 166(5)               |
|                  | O(5) -H(5A) ...O(6) [1-x,1-y,1-z]         | 0.91(6)       | 1.88(6)         | 2.790(5)        | 175(5)               |
|                  | O(5) -H(5B) ...O(8) [x, y, z]             | 0.86(17)      | 2.08(12)        | 2.850(6)        | 149(15)              |
|                  | O(6) -H(6A) ...O(3) [1+x,1/2-y,1/2+z]     | 0.89(8)       | 2.04(8)         | 2.847(5)        | 151(7)               |
|                  | O(6) -H(6B) ...Cl(1) [x,1/2-y,1/2+z]      | 0.90(6)       | 2.23(7)         | 3.108(4)        | 168(6)               |
|                  | O(7) -H(7A) ...Cl(1) [-x,1/2+y,1/2-z]     | 0.85(5)       | 2.39(6)         | 3.173(4)        | 155(5)               |
|                  | O(7) -H(7B) ...O(6) [x, y, z]             | 0.85(4)       | 1.98(4)         | 2.784(5)        | 157(5)               |
|                  | O(8) -H(8B) ...O(3) [-x,-y,-z]            | 0.85(5)       | 2.50            | 3.299(6)        | 157                  |
|                  | O(8) -H(8B) ...O(4) [-x,-y,-z]            | 0.85          | 1.90            | 2.614(6)        | 141                  |

|                  |                                        |      |      |          |     |
|------------------|----------------------------------------|------|------|----------|-----|
|                  | C(7)-H(7)···O(7) [x,-1+y,z]            | 0.93 | 2.57 | 3.461(6) | 159 |
|                  | C(11)-H(11)···O(6) [x, y, z]           | 0.93 | 2.59 | 3.500(5) | 165 |
| <b>Complex 5</b> | C(1)-H(1)···O(4) [x, y, z]             | 0.93 | 2.50 | 3.105(6) | 123 |
|                  | C(3)-H(3)···O(2) [x,y,1+z]             | 0.93 | 2.56 | 3.349(6) | 143 |
|                  | C(10)-H(10)···O(8) [1/2-x,1/2+y,1-z]   | 0.93 | 2.54 | 3.096(6) | 119 |
|                  | C(32)-H(32)···O(10) [1/2-x,1/2+y,-z]   | 0.93 | 2.55 | 3.205(7) | 128 |
|                  | C(42)-H(42)···O(11) [1/2-x,-1/2+y,2-z] | 0.93 | 2.37 | 3.240(9) | 155 |
|                  | C(46)-H(46)···O(11) [x,y,-2+z]         | 0.93 | 2.48 | 3.235(7) | 138 |

Table S3: XYZ coordinates of complex 2:

-----

-----

| Center Number | Atomic Number | Coordinates (Angstroms) |          |           |
|---------------|---------------|-------------------------|----------|-----------|
|               |               | X                       | Y        | Z         |
| 1             | 30            | -0.106189               | 0.379032 | -0.017487 |
| 2             | 6             | 0.354547                | 3.194401 | -0.634150 |
| 3             | 6             | 0.809038                | 3.042563 | 0.721875  |
| 4             | 6             | 1.359961                | 4.129428 | 1.392258  |
| 5             | 6             | 0.468540                | 4.423810 | -1.261492 |
| 6             | 6             | 1.465376                | 5.378888 | 0.716268  |
| 7             | 1             | 1.828128                | 6.111460 | 1.159591  |
| 8             | 6             | 1.048419                | 5.517313 | -0.550350 |
| 9             | 1             | 1.138172                | 6.339440 | -0.974553 |
| 10            | 6             | -0.599177               | 2.216540 | -2.471360 |



|    |   |           |           |           |
|----|---|-----------|-----------|-----------|
| 11 | 1 | -0.960074 | 1.468602  | -2.890346 |
| 12 | 6 | 1.762115  | 3.934432  | 2.719939  |
| 13 | 1 | 2.125308  | 4.637266  | 3.208036  |
| 14 | 6 | 1.052259  | 1.684859  | 2.553764  |
| 15 | 1 | 0.943022  | 0.857585  | 2.963457  |
| 16 | 6 | -0.528717 | 3.424241  | -3.187962 |
| 17 | 1 | -0.845974 | 3.476492  | -4.060381 |
| 18 | 6 | 0.008145  | 4.506302  | -2.584804 |
| 19 | 1 | 0.072778  | 5.310865  | -3.048206 |
| 20 | 6 | 1.619768  | 2.715030  | 3.284861  |
| 21 | 1 | 1.900613  | 2.568298  | 4.158663  |
| 22 | 6 | -4.083491 | -2.120174 | -1.060839 |
| 23 | 1 | -3.492928 | -2.336911 | -1.745525 |
| 24 | 6 | -4.569706 | -0.987513 | 0.981938  |
| 25 | 1 | -4.309361 | -0.410873 | 1.663878  |
| 26 | 6 | -5.820035 | -1.549893 | 1.006201  |
| 27 | 1 | -6.388886 | -1.378544 | 1.721541  |
| 28 | 6 | -6.236326 | -2.363603 | -0.018004 |
| 29 | 6 | -3.689226 | -1.272065 | -0.053535 |
| 30 | 6 | -5.362810 | -2.651262 | -1.052764 |
| 31 | 1 | -5.636955 | -3.206077 | -1.748237 |
| 32 | 6 | 2.964665  | -2.195783 | 0.011049  |
| 33 | 6 | 3.242772  | -3.159715 | 0.964261  |
| 34 | 1 | 2.635835  | -3.319982 | 1.650638  |
| 35 | 6 | 5.012768  | -2.746651 | -1.124895 |

|    |   |           |           |           |
|----|---|-----------|-----------|-----------|
| 36 | 1 | 5.596114  | -2.622708 | -1.838981 |
| 37 | 6 | 3.852117  | -2.015584 | -1.047595 |
| 38 | 1 | 3.656336  | -1.392292 | -1.709803 |
| 39 | 6 | 5.310854  | -3.667549 | -0.138620 |
| 40 | 6 | 6.578557  | -4.406466 | -0.153852 |
| 41 | 1 | 6.733650  | -5.005146 | 0.540508  |
| 42 | 6 | 4.410654  | -3.880277 | 0.902081  |
| 43 | 1 | 4.600951  | -4.511673 | 1.556812  |
| 44 | 8 | 1.572488  | -0.449769 | -0.735702 |
| 45 | 8 | -1.977829 | 0.094035  | 0.866623  |
| 46 | 8 | -1.593148 | -0.823699 | -1.062342 |
| 47 | 8 | 0.963605  | -1.479064 | 1.082460  |
| 48 | 8 | 7.427963  | -4.298949 | -0.988421 |
| 49 | 6 | -2.349064 | -0.630651 | -0.088750 |
| 50 | 6 | 1.750536  | -1.339751 | 0.133855  |
| 51 | 7 | -0.173804 | 2.102214  | -1.231913 |
| 52 | 7 | 0.656088  | 1.822869  | 1.297549  |
| 53 | 6 | -7.584058 | -2.940217 | -0.028175 |
| 54 | 1 | -7.895320 | -3.293596 | -0.829502 |
| 55 | 8 | -8.315906 | -2.990389 | 0.924924  |

-----
